# Supplementary material
Source: PubMed Central journal article supplement (PMC8111122)
Supplement: Tables_S2_to_S5_and_Fig._S1_to_S5.pdf [file Tables_S2_to_S5_and_Fig._S1_to_S5.pdf]

**Table S2. Patient characteristics (n=47) for the longitudinal evaluation study.** Values are median (IQR) unless otherwise indicated. Symptoms are based on those reported in initial encounter.

|                                 |                  |
|---------------------------------|------------------|
| Age                             | 62 (44 - 80)     |
| Male, n (%)                     | 29 (62)          |
| Female, n (%)                   | 18 (38)          |
| <b>Race, n (%)</b>              |                  |
| Black/African American          | 23 (49)          |
| White/Caucasian                 | 17 (36)          |
| Hispanic/Latino                 | 4 (9)            |
| Asian                           | 2 (4)            |
| Other                           | 1 (2)            |
| <b>Symptoms, n (%)</b>          |                  |
| Fever                           | 34 (72)          |
| Cough                           | 29 (62)          |
| Difficulty breathing            | 24 (51)          |
| Muscle/body pain                | 14 (30)          |
| Chills                          | 9 (19)           |
| Weakness/fatigue                | 7 (15)           |
| Sore throat                     | 6 (13)           |
| Other                           | 31 (66)          |
| <b>Time since symptom onset</b> | <b>6 (4 - 8)</b> |

**Table S3. Analytical sensitivity and specificity towards combined IgM and IgG for the evaluated SARS-CoV-2 antibody-based LFAs.** LFA results were evaluated against RT-PCR-confirmed results, and reported with a 95% binomial exact CI. McNemar test was used to calculate test performance difference (two-tailed p-values) between the lateral flow assays with the RT-PCR-confirmed results.

| Lateral flow assay     | vs. PCR Confirmed Results |          |    |                      |          |    |          |
|------------------------|---------------------------|----------|----|----------------------|----------|----|----------|
|                        | Convalescent Plasma       |          |    | Pre-pandemic samples |          |    | <i>p</i> |
|                        | Sensitivity (%)           | 95% CI   | N  | Specificity (%)      | 95% CI   | N  |          |
| <b>All Test</b>        | 93                        | 80 - 98  | 40 | 97                   | 88 - 100 | 60 | 1.000    |
| <b>AYTU</b>            | 83                        | 67 - 93  | 40 | 98                   | 91 - 100 | 60 | 0.077    |
| <b>Clarity</b>         | 98                        | 87 - 100 | 40 | 90                   | 79 - 96  | 60 | 0.131    |
| <b>CoronaChek</b>      | 95                        | 83 - 99  | 40 | 100                  | 94 - 100 | 60 | 0.480    |
| <b>Covisure</b>        | 68                        | 51 - 82  | 38 | 95                   | 86 - 99  | 59 | 0.039    |
| <b>DNA Link</b>        | 98                        | 87 - 100 | 40 | 80                   | 67 - 89  | 60 | 0.006    |
| <b>Nirmidas</b>        | 93                        | 80 - 98  | 40 | 100                  | 94 - 100 | 60 | 0.248    |
| <b>Premier Biotech</b> | 97                        | 86 - 100 | 40 | 100                  | 94 - 100 | 60 | 1.000    |
| <b>Ready Result</b>    | 88                        | 70 - 94  | 40 | 97                   | 88 - 100 | 60 | 0.450    |
| <b>SafeCare</b>        | 95                        | 83 - 99  | 40 | 90                   | 79 - 96  | 60 | 0.289    |
| <b>Sensing Self</b>    | 88                        | 73 - 96  | 40 | 100                  | 94 - 100 | 60 | 0.074    |
| <b>Smart Screen</b>    | 65                        | 48 - 79  | 40 | 92                   | 82 - 97  | 60 | 0.067    |
| <b>TBG</b>             | 95                        | 83 - 99  | 40 | 88                   | 77 - 95  | 60 | 0.182    |
| <b>Wondfo</b>          | 55                        | 38 - 71  | 40 | 98                   | 91 - 100 | 60 | 0.0002   |
| <b>Zeus</b>            | 58                        | 41 - 73  | 40 | 97                   | 88 - 100 | 60 | 0.001    |

**Table S4. Analytical sensitivity and specificity towards IgM for the evaluated SARS-CoV-2 antibody-based LFAs.** LFA results were evaluated against RT-PCR-confirmed results, and reported with a 95% binomial exact CI. McNemar test was used to calculate test performance difference (two-tailed p-values) between the lateral flow assays with the RT-PCR-confirmed results.

| Lateral flow assay | vs. PCR results     |         |     |                      |          |     |          |
|--------------------|---------------------|---------|-----|----------------------|----------|-----|----------|
|                    | Convalescent Plasma |         |     | Pre-pandemic samples |          |     | <i>p</i> |
|                    | Sensitivity (%)     | 95% CI  | N   | Specificity (%)      | 95% CI   | N   |          |
| All Test           | 0                   | 0 - 9   | 40  | 97                   | 88 - 100 | 60  | < 0.0001 |
| AYTU               | 45                  | 29 - 62 | 40  | 100                  | 94 - 100 | 60  | 0.0001   |
| Clarity            | 83                  | 67 - 93 | 40  | 90                   | 79 - 96  | 60  | 1.000    |
| CoronaChek         | 63                  | 46 - 77 | 40  | 100                  | 94 - 100 | 60  | 0.000    |
| Covisure           | 66                  | 49 - 80 | 40  | 95                   | 86 - 99  | 60  | 0.024    |
| DNA Link           | 83                  | 67 - 93 | 40  | 80                   | 67 - 89  | 60  | 0.359    |
| Nirmidas           | 83                  | 59 - 87 | 40  | 100                  | 94 - 100 | 60  | 0.004    |
| Premier Biotech    | 87                  | 72 - 96 | 40  | 100                  | 94 - 100 | 60  | 0.074    |
| Ready Result       | 85                  | 73 - 96 | 40  | 97                   | 88 - 100 | 60  | 0.289    |
| SafeCare           | 78                  | 62 - 89 | 40  | 98                   | 91 - 100 | 60  | 0.027    |
| Sensing Self       | 15                  | 6 - 30  | 40  | 100                  | 94 - 100 | 60  | 0.0001   |
| Smart Screen       | 60                  | 43 - 75 | 40  | 92                   | 82 - 97  | 60  | 0.029    |
| TBG                | 88                  | 73 - 96 | 40  | 88                   | 77 - 95  | 60  | 0.773    |
| Wondfo             | N/A                 | N/A     | N/A | N/A                  | N/A      | N/A | N/A      |
| Zeus               | 35                  | 21 - 53 | 40  | 97                   | 88 - 100 | 60  | < 0.0001 |

**Table S5. Analytical sensitivity and specificity towards IgG for the evaluated SARS-CoV-2 antibody-based LFAs.** LFA results were evaluated against RT-PCR-confirmed results, and reported with a 95% binomial exact CI. McNemar test was used to calculate test performance difference (two-tailed p-values) between the lateral flow assays with the RT-PCR-confirmed results.

| Lateral flow assay     | vs. PCR results     |         |     |                      |          |     | <i>p</i> |
|------------------------|---------------------|---------|-----|----------------------|----------|-----|----------|
|                        | Convalescent Plasma |         |     | Pre-pandemic samples |          |     |          |
|                        | Sensitivity (%)     | 95% CI  | N   | Specificity (%)      | 95% CI   | N   |          |
| <b>All Test</b>        | 93                  | 80 - 98 | 40  | 100                  | 94 - 100 | 60  | 0.248    |
| <b>AYTU</b>            | 78                  | 62 - 89 | 40  | 98                   | 91 - 100 | 60  | 0.027    |
| <b>Clarity</b>         | 65                  | 48 - 79 | 40  | 100                  | 94 - 100 | 60  | 0.001    |
| <b>CoronaChek</b>      | 90                  | 76 - 97 | 40  | 100                  | 94 - 100 | 60  | 0.134    |
| <b>Covisure</b>        | 68                  | 51 - 82 | 40  | 97                   | 88 - 100 | 60  | 0.016    |
| <b>DNA Link</b>        | 95                  | 83 - 99 | 40  | 100                  | 94 - 100 | 60  | 0.480    |
| <b>Nirmidas</b>        | 85                  | 80 - 98 | 40  | 100                  | 94 - 100 | 60  | 0.248    |
| <b>Premier Biotech</b> | 92                  | 79 - 98 | 40  | 100                  | 94 - 100 | 60  | 0.248    |
| <b>Ready Result</b>    | 88                  | 73 - 96 | 40  | 97                   | 88 - 100 | 60  | 0.450    |
| <b>SafeCare</b>        | 93                  | 80 - 98 | 40  | 90                   | 79 - 96  | 60  | 0.505    |
| <b>Sensing Self</b>    | 88                  | 73 - 96 | 40  | 100                  | 94 - 100 | 60  | 0.074    |
| <b>Smart Screen</b>    | 25                  | 13 - 41 | 40  | 100                  | 94 - 100 | 60  | < 0.0001 |
| <b>TBG</b>             | 95                  | 83 - 99 | 40  | 97                   | 88 - 100 | 60  | 0.617    |
| <b>Wondfo</b>          | N/A                 | N/A     | N/A | N/A                  | N/A      | N/A | N/A      |
| <b>Zeus</b>            | 55                  | 38 - 71 | 40  | 100                  | 94 - 100 | 60  | <0.0001  |

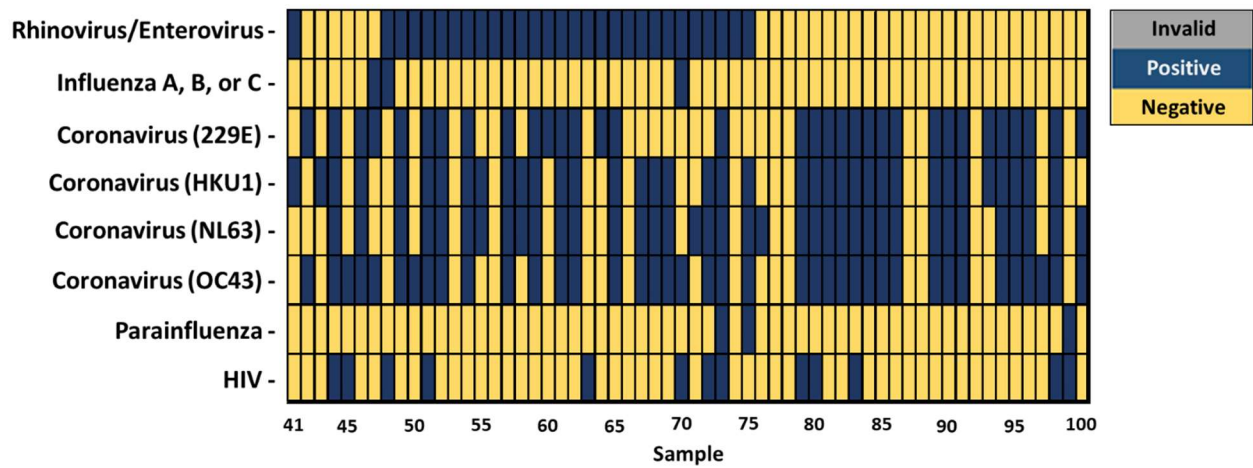

**Figure S1.** Evaluation of cross-reactivity towards other non-SARS-CoV-2 viruses. LFAs were challenged with pre-pandemic samples obtained between 2016 and 2019 from patients known to be infected with other non-SARS-CoV-2 viruses. Pronounced cross-reactivity is observed towards the different strains for coronaviruses (229E, HKU1, NL63, and OC43), and less so for rhinovirus/enterovirus, influenza A, B, or C, parainfluenza, and HIV.

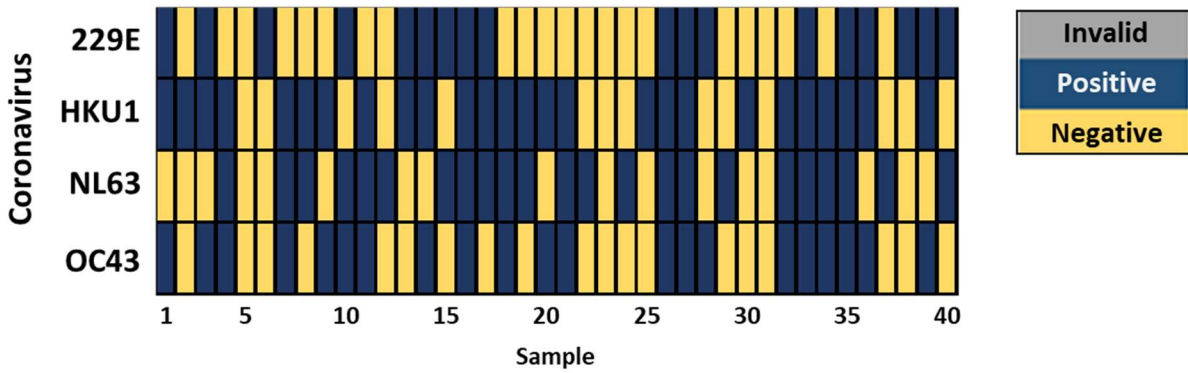

**Figure S2. Evaluation for coinfection with non-SARS-CoV-2 coronaviruses for convalescent patients.** Samples obtained from patients confirmed to be positive for SARS-CoV-2 via PCR-based testing were evaluated for non-SARS-CoV-2 coronaviruses (229E, HKU1, NL63, and OC43). All but three of the patient were infected with at least one of the four coronavirus strains evaluated (229E, HKU1, NL63, and OC43).



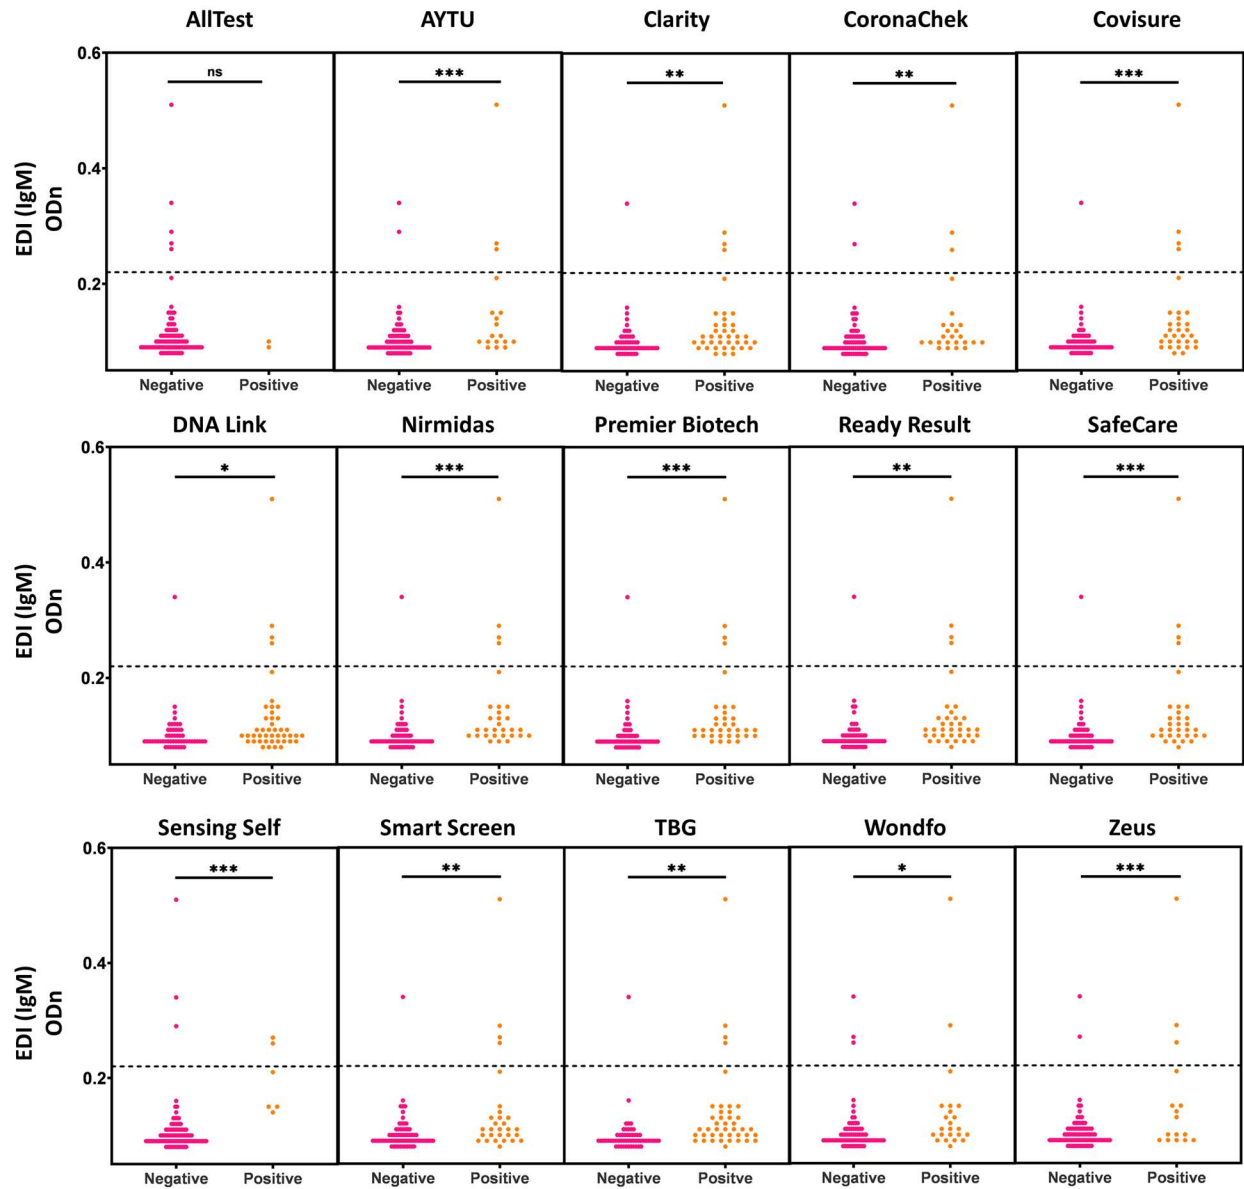

**Figure S4.** Comparison of IgM levels with LFA result. IgM levels were determined using EDI, where normalized optical densities (ODn) > 0.22 are considered positive, levels between ODn 0.22 and 0.18 are considered indeterminate, and ODn < 0.18 are considered negative. Data suggests little variation in IgM concentration between positive and negative LFA results. Sample set included the 100 specimens used for prior assessment shown on **Fig. 2**.



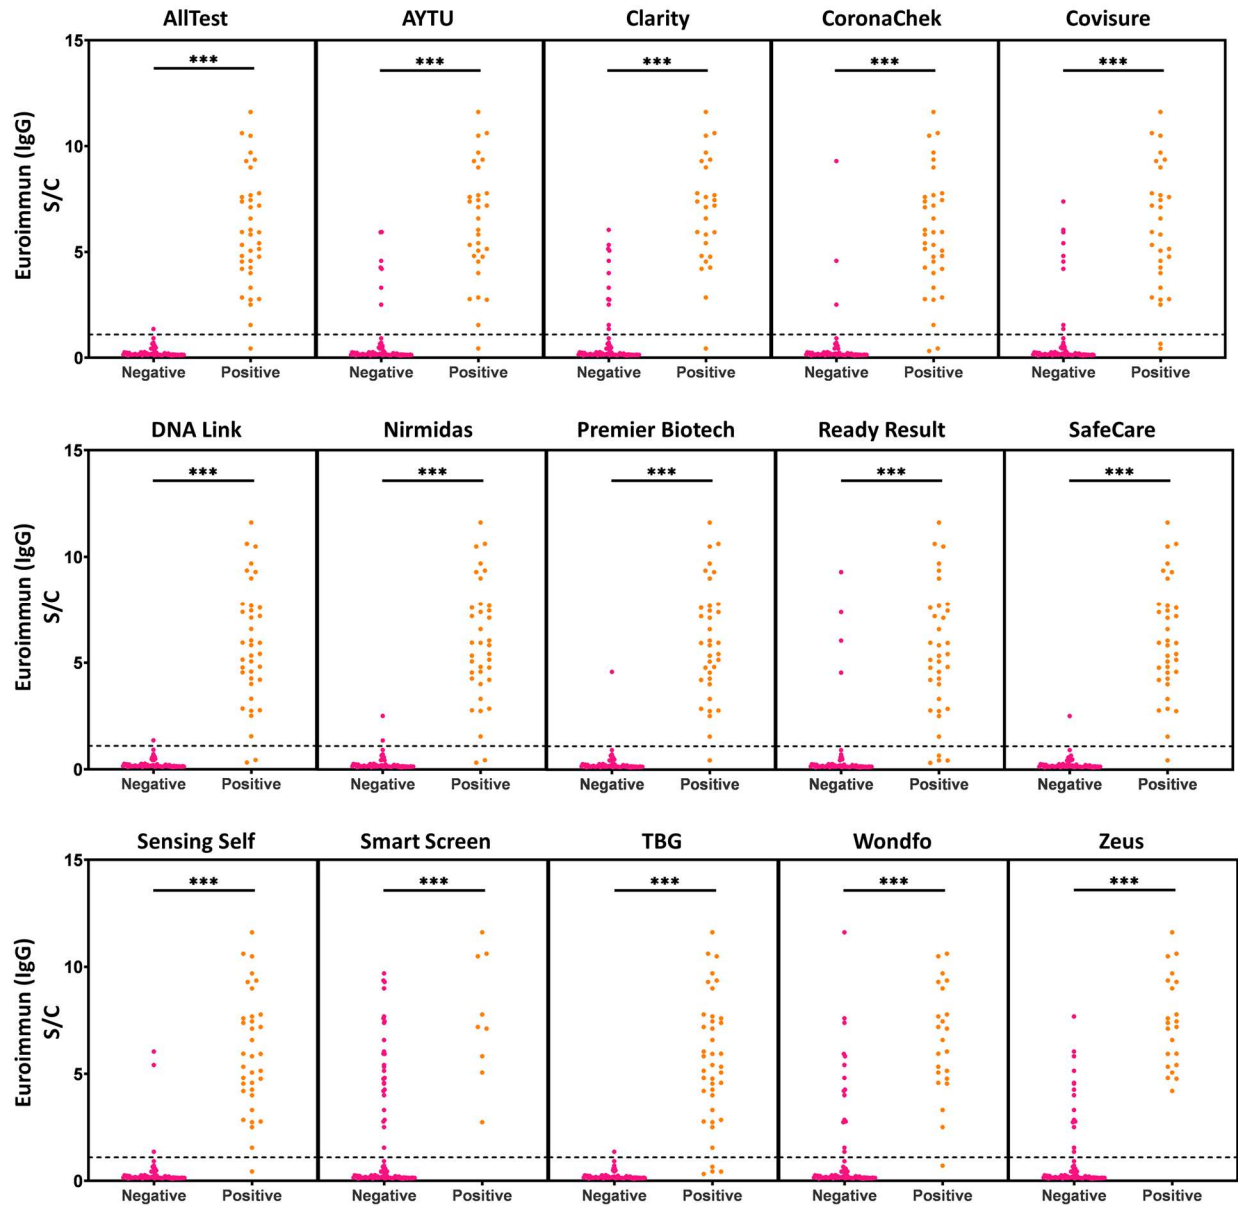

**Figure S5.** Comparison of IgG levels with POCT result. IgG levels were determined using Euroimmun, where signal to cut off (S/C)  $>1.1$  S/C are considered positive, S/C between 0.8-1.1 are considered indeterminate, and S/C  $<0.8$  are considered negative. Based on this cutoff, data indicates the occurrence of false-negative results across all the POCTs evaluated. This observation is more prominent for Smart Screen, Wondfo, and Zeus. Contrary to the negative results, all positive POCT results were above the cutoff, and thus considered quantitatively positive. Sample set included the 100 specimens used for prior assessment shown on **Fig. 2**.
